# Supplementary material for: Mutator Phenotype and DNA Double-Strand Break Repair in BLM Helicase-Deficient Human Cells
Source: PubMed Central journal article supplement (PMC5108877; doi:10.1128/mcb.00443-16), 2016-11-14
Supplement: MCB.00443-16_zmb999101353so2.pdf [file MCB.00443-16_zmb999101353so2.pdf]

**A.**

52081 tccaactagt ggggacatga ttttcgtcaa gattacaaaa

52121 gaatgaatat gcttcgccag aagtttcctt ctggtccggt

52161 gatggctctt acggccacag ctaatcccag ggtacagaag

52201 gacatcctga ctcagctgaa gattctcaga cctcaggtgt

52241 aagttggtgc acgtcacgta

**B.****BLM-TSCE5**

|         |       |                           |        |         |       |
|---------|-------|---------------------------|--------|---------|-------|
| clone 5 | 52171 | acg( $\Delta 7$ bp)       | cta    | atcccag | 52190 |
|         | 52171 | acggccaca( $\Delta 5$ bp) | tcccag |         | 52190 |

**BLM-TSCER2**

|          |       |                               |             |       |
|----------|-------|-------------------------------|-------------|-------|
| clone 2  | 52151 | c( $\Delta 74$ bp + Ins 7 bp) | caga        | 52230 |
|          | 52161 | gatggctc( $\Delta 18$ bp)     | ccag        | 52190 |
| clone 10 | 52171 | acggc( $\Delta 75$ bp)        | acgtcacgta  | 52260 |
|          | 52171 | acggcc( $\Delta 183$ bp)      | caagttgtaac | 52370 |

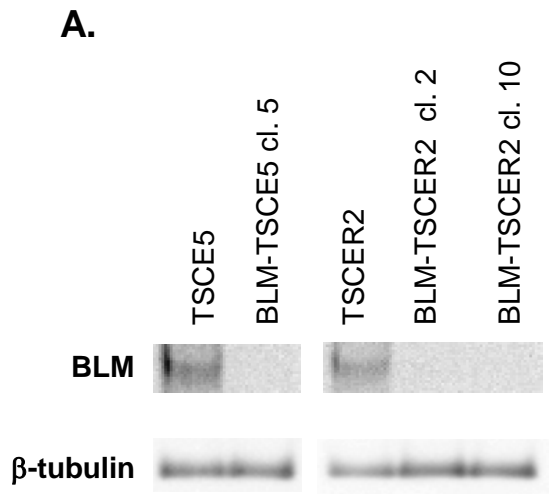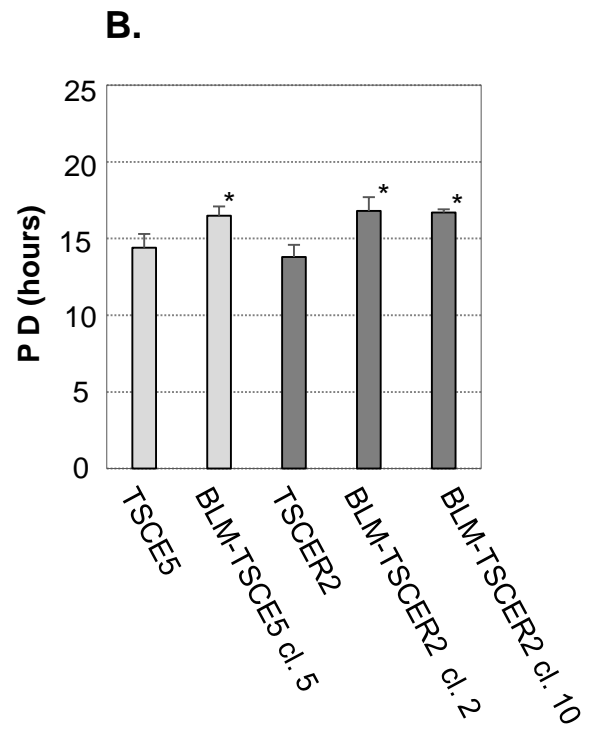

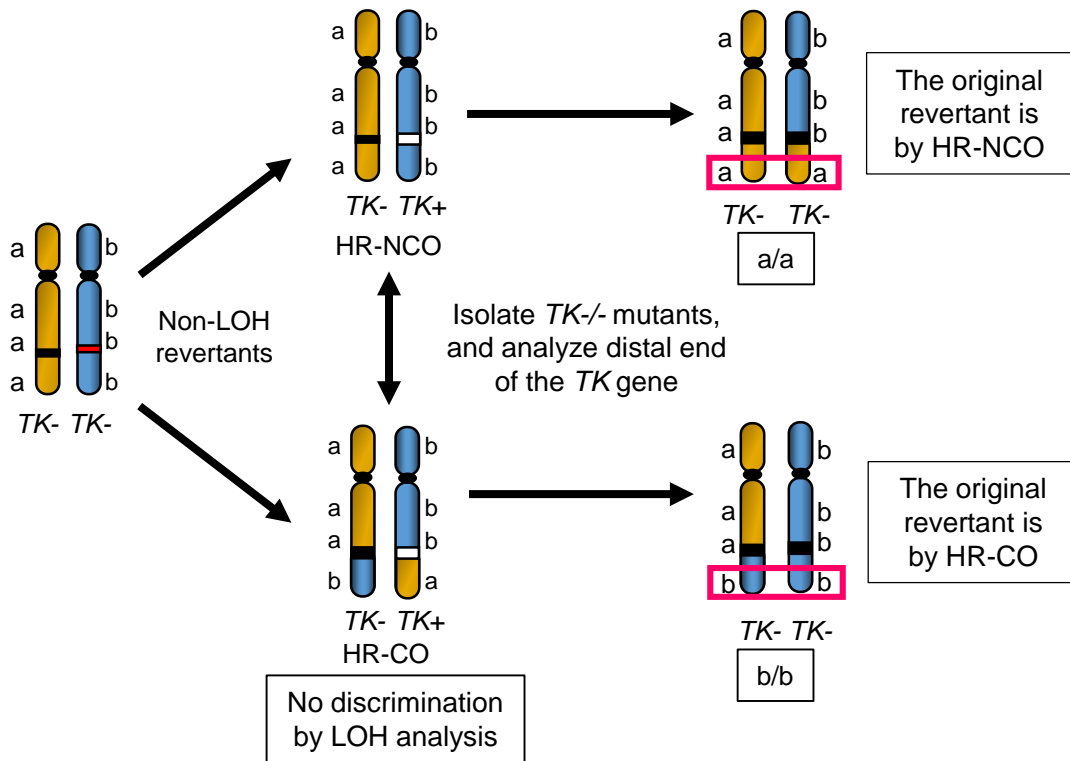

## A. Non-selected mutants from TSCE5

### 1) Small deletion (< 60 bp); 8 clones

TSCE\_141 agatccattaccctggtatccctactctcgaggatct ( $\Delta 14$ )  
TSCE\_213 agatccattaccctggtatccctactctcgaggatct ( $\Delta 2$ )  
TSCE\_225 gggccaaatggccggagttgtcagatccattaccctggtatccctactctcg ( $\Delta 30$ )  
TSCE\_302 agatccattaccctggtatccctactctcgaggatct ( $\Delta 4$ )  
TSCE\_396 agatccattaccctggtatccctactctcgaggatct ( $\Delta 1$ )  
TSCE\_431 tgtcagatccattaccctggtatccctactctcgaggatctggcagcgt ( $\Delta 31$ )  
TSCE\_434 agatccattaccctggtatccctactctcgaggatct ( $\Delta 9$ )  
TSCE\_311 ttactcggggccaaatggccggagttgtcagatccattaccctggtatccctactctcgagg ( $\Delta 50$ )

### 2) Middle deletion (60 bp – 1kb); 3 clones

TSCE\_262  
ttgccaaggtcacacagataatgggtccagcgaagagtgggtgccgagcccaaggcagcaggcctttggccactgcagtgttaaacagcaca  
gctggtgtggaagtcgggtgctgagtcctgggtacctggactcggaggggaagctggctgcagggggaaggggctgcgcagttggatgtacct  
gtcgtctgctggggggcgtgcgggtggacacagtcctccggcctggggagcctcgtgggagaattaagagttactccgggccaatggccgg  
agttgtcagatccattaccctggtatccctactctcgagg ( $\Delta 295$ )  
TSCE\_306  
gggccaaatggcggagttgtcagatccattaccctggtatccctactctcgaggatctggcagcgtcttcgctggggctccagggagctgctgctg  
gggtggaagctctcacactcttctccacgtgcccttccagttccctgacatcgtggagttctcgagg ( $\Delta 144$ )  
TSCE\_392  
cggcctggggagcctcgtgggagaattaagagttactccgggccaatggccggagttgtcagatccattaccctggtatccctactctcgaggat  
ctggcagcgtcttcgctggggctccagggagctgctgctgggggtggaagctct ( $\Delta 129$ )

### 3) Rearrangements; 4 clones

TSCE\_9 agatccattaccctggtatccctgcaagactctcgaggatct ( $\Delta 9$  / +6 unknown)  
TSCE\_393 ctccgggccaatggccggagttgtcagatccattaccctggtatccctactctcgaggatctggcag ( $\Delta 23$  /  $\Delta 9$ )  
TSCE\_283  
ggagttgtcagatccattaccctggtatccctactctcgaggatctggcagcgtcttcgctggggctccagggagctgctgctgggggtggaagctctc  
acactcttctccacgtgcccttccagttccctgacatcgtggagttctgcgaggccatggccaacgcccgggaagaccgtaattgtggctgactg  
gatggaccttccagaggaaggttaaggcgtctgatccaggtctggagctgggattgaggagggcaagaggcttctggatgggacagagaca  
ccagctctgggtgaccagggctcagccaccacaggggtacggccgagctgctcaggccttgctgagcc ( $\Delta 37$  / +117 inverted  
insertion of part of TK gene /  $\Delta 179$ )  
TSCE\_214  
ggggagcctcgtgggagaattaagagttactccgggccaatggccggagttgtcagatccattaccctggtatccctactctcgaggatctggca  
gcgtcttcgctggggctccagggagctgctgctgggggtggagctgctgctgggggtggaagctctcaca ( $\Delta 22$  / +18 inverted  
insertion of part of TK gene)

## B. Non-selected mutants from BLM-TSCE5

### 1) Small deletion (< 60 bp); 18 clones

BLM\_19 agatccattaccctgttatccctactctcgaggatct ( $\Delta 9$ )  
BLM\_47 agatccattaccctgttatccctactctcgaggatct ( $\Delta 11$ )  
BLM\_68 agatccattaccctgttatccctactctcgaggatct ( $\Delta 9$ )  
BLM\_75 agatccattaccctgttatccctactctcgaggatct ( $\Delta 16$ )  
BLM\_83 agatccattaccctgttatccctactctcgaggatct ( $\Delta 16$ )  
BLM\_145 agatccattaccctgttatccctactctcgaggatct ( $\Delta 3$ )  
BLM\_147 agatccattaccctgttatccctactctcgaggatct ( $\Delta 24$ )  
BLM\_233 agatccattaccctgttatccctactctcgaggatct ( $\Delta 9$ )  
BLM\_268 tcagatccattaccctgttatccctactctcgaggatctggcag ( $\Delta 31$ )  
BLM\_328 agatccattaccctgttatccctactctcgaggatct ( $\Delta 4$ )  
BLM\_361 agatccattaccctgttatccctactctcgaggatct ( $\Delta 1$ )  
BLM\_356 ttaccctgttatccctactctcgaggatctggcagcgtcttcgct ( $\Delta 31$ )  
BLM\_364 agatccattaccctgttatccctactctcgaggatct ( $\Delta 9$ )  
BLM\_371 agatccattaccctgttatccctactctcgaggatct ( $\Delta 4$ )  
BLM\_377 agatccattaccctgttatccctactctcgaggatct ( $\Delta 9$ )  
BLM\_383 ccggagtgtcagatccattaccctgttatccctactctcgaggatctggcag ( $\Delta 40$ )  
BLM\_410 agatccattaccctgttatccctactctcgaggatct ( $\Delta 9$ )  
BLM\_466 agatccattaccctgttatccctactctcgaggatct ( $\Delta 14$ )

### 2) Middle deletion (60 bp – 1kb); 3 clones

BLM\_67 gagaattaagagttactccgggccaatggccggaggtgtcagatccattaccctgttatccctactctcgaggatctggcagcgtcttcgct ( $\Delta 73$ )  
BLM\_2 ggggtgacacagtccccggcctggggagcctcgtgggagaattaagagttactccgggccaatggccggaggtgtcagatccattaccctgttatccctactctcgaggatct ( $\Delta 108$ )  
BLM\_327 caaatggccggaagtgtcagatccattaccctgttatccctactctcgaggatctggcagcgtcttcgctggggctccaggagctgctgctgggggtgaagctctcacactttctccacgtgcccttccagttccctgacatcgtggag ( $\Delta 131$ )

### 3) Large deletion (>1kb); 2 of 6 clones

BLM\_176, BLM\_243  
ggcacagaggct-----  
gtcagatccattaccctgttatccctactctcgaggatctggcagcgtcttcgctggggctccaggagctgct ( $\Delta 1518$ )

### 4) Insertion (1 bp); 2 clones

BLM\_23, BLM\_259 agatccattaccctgttatccctactctcgaggatct (+1)

## 5) Rearrangement ; 5 clones

BLM\_266 agatccagtaccctgttatccctactctcgaggatct (+1 / Δ9)

BLM\_102

gctgcgagttgtggatgtacctgtcgtctgctggggggcgctgctgggtggacacagtccccggcctggggagcctcgtgggagaattaaga  
gttactccggccaaatggccggagttgcagatccattaccctgttatccctactctcgaggatctggcagcgtcttcccgagccaaggca  
gcagctgggctccagggagctgc (Δ157 / +18 unknown)

BLM\_432

gttgtcagatccattaccctgttatccctactctcgaggatctggcagcgtcttcgctggggctccagggagctgctgctggggtggaagctctca  
cactctttctccacgtgcccttccagttccctgacatcgtggagttctgcgaggccatggccaacgccgggaagaccgtaattgtgctgcact  
ggatgggacctccagaggaaggttaaggcgtctgatccaggtctggagctgggattgaggaggcaagaggcttctggatgggacaga  
gacaccagctctgggtgaccagggctcagccaccacagggttacggccgagctgctcaggcctggctgagccaagggactccatggct  
gtgcagactgctgcatctgttcggcaggtgcttgaattggcaaaagg (Δ97 / +129 inverted insertion of part of TK  
gene / Δ167)

BLM\_85

ccgggcccaatggccggagttgcagatccattacc (sequence of part of pCBASce vector)gttatccctactctcgagga  
(Δ30 / +1484 part of pCBASce vector)

BLM\_172

aatggccggagttgcagatccattaccctgttatccctactctcgaggatctggcagcgtcttcgctggggctccagggagctgctgctggggt  
ggaagctctcacacttttctccacgtgcccttccagttccctgacatcgtggagttctgcgaggccatggccaacgccgggaagaccgtaattg  
tggctgcactggatgggacctccagaggaaggttaaggcgtctgatccaggtctggagctgggattgaggaggcaagaggcttctggatgg  
gcacagagacaccagctctgggtgaccagggctcagccaccacagggttacggccgagctgctcaggcctggctgagccaagggactcc  
atggtctgtgcagactgctgcatctgttcggcaggtgcttgaattggcaaaaggacagagccgggcatgggtgctctgggggtgggggaa  
ggactaaggtcagagcaaaactctcctggtcagtgcttgaatcagagggttaaaagaaaaaccacctggttaaggtgctgagcgcctc  
tgtctttccatgggagcgcagccatttggggccatcctgaacctggtgccgctggccgagagcgtggtgaagctgacggcggtgcatggagt  
gcttccgggaagccgcctataccaagaggtcggcacagagaaggaggtagctccacctgccttccctgcaggccggcggggtgggggtat  
ggctctgcctcctctctgctgcccctcaccatccccctgcccctgcccaggtcgaggtgattgggggagcagacaagtaccactccgtgtg  
tcggctctgctacttcaagaaggcctcaggccagcctgccggggccggacaacaaagagaactcccagtgccaggaaagccaggggaa  
ccgtggtgccaggaagctcttggcccacagcagattctgcaatgcagccctgccaactgaggacctgcgagggccgcccgtcccttct  
gccactgccgcctactggacgctgccctgcatgctcccagccactccaggaggaagtcgggagggcgtggagggtagccacacctggcctt  
ctgggaactctccttgtgtggctgcccacctgccgcatgctccctctctcctaccactggtctgcttaagcttccctctcagctgctgggtgac  
cttggcaatgacgatcgcccaggctggagctggccccgcttgggtggcctgggatctggcacactccctctct (Δ1178 / +14 unknown)

## 6) Recombination ; 2 clones

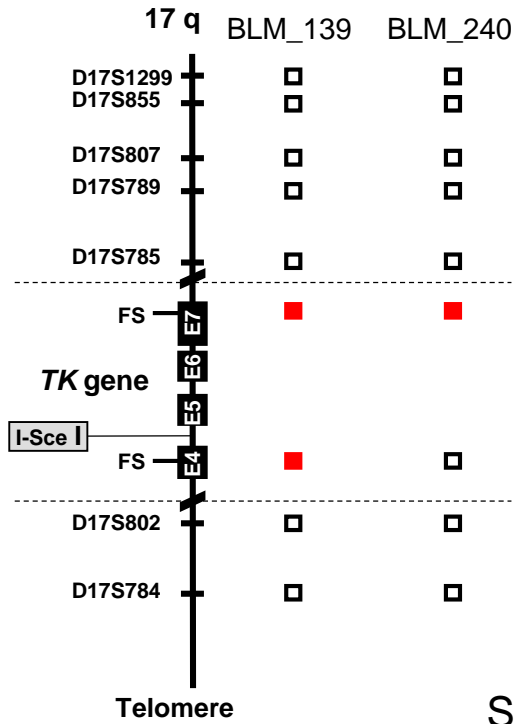

Supplement 4B (continued)

## 7) Translocation ; 1 clones

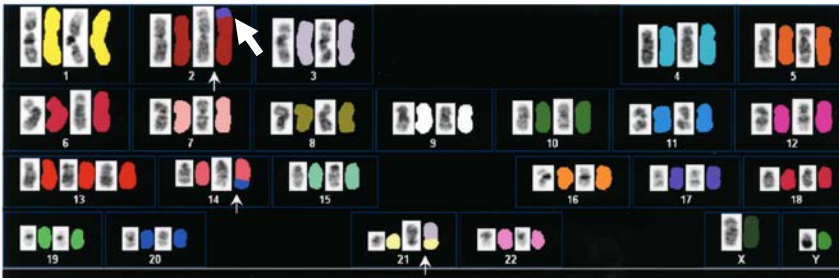

BLM\_89

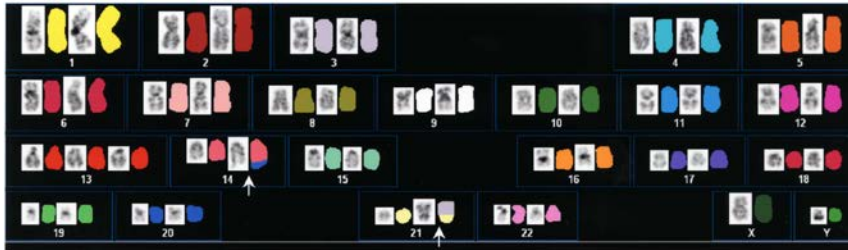

Parental BLM-TSCE5

Supplement 4B (continued)
